# Supplementary material for: Cytomembrane nanovaccines show therapeutic effects by mimicking tumor cells and antigen presenting cells
Source: PubMed Central journal article supplement (PMC6642123; doi:10.1038/s41467-019-11157-1), 2019-07-19
Supplement: 41467_2019_11157_MOESM1_ESM.pdf [file 41467_2019_11157_MOESM1_ESM.pdf]

**Cytoplasmic membrane nanovaccines show therapeutic effects by mimicking tumor cells and antigen presenting cells**

Liu *et al.*

## Table of contents

|                                                                                                                                                                                   |     |
|-----------------------------------------------------------------------------------------------------------------------------------------------------------------------------------|-----|
| <b>Supplementary Figure 1</b>   CLSM images of 4T1, DC and FC.....                                                                                                                | S3  |
| <b>Supplementary Figure 2</b>   Fluorescence images of cells, cell lysate and FMs with or without nuclease treatment after stained with Hoechst 33342.....                        | S4  |
| <b>Supplementary Figure 3</b>   Hydrodynamic sizes of MOF, MOF@CM, MOF@DM and MOF@FM.....                                                                                         | S5  |
| <b>Supplementary Figure 4</b>   Stability of MOF and MOF@FM in water and serum.....                                                                                               | S6  |
| <b>Supplementary Figure 5</b>   UV-vis spectra of FM, MOF and MOF@FM.....                                                                                                         | S7  |
| <b>Supplementary Figure 6</b>   In vitro cytotoxicity of MOF, MOF@CM, MOF@DM and MOF@FM.....                                                                                      | S8  |
| <b>Supplementary Figure 7</b>   Flow cytometry sequential gating strategies.....                                                                                                  | S9  |
| <b>Supplementary Figure 8</b>   Flow cytometry analysis of the uptake of BMDCs to MOF@CM, MOF@DM and MOF@FM and the corresponding mean fluorescence intensity (MFI) analysis..... | S10 |
| <b>Supplementary Figure 9</b>   DCs maturation after treatment with CM, DM and FM, respectively.....                                                                              | S11 |
| <b>Supplementary Figure 10</b>   In vitro cytotoxicity of the CM, DM or FM-pretreated DCs activating T lymphocytes against 4T1 cells.....                                         | S12 |
| <b>Supplementary Figure 11</b>   H&E staining of major organs at 36 d after tumor inoculation. Scale bar = 20 $\mu$ m.....                                                        | S13 |
| <b>Supplementary Figure 12</b>   Hemolytic assay of MOF, MOF@CM, MOF@DM and MOF@FM.....                                                                                           | S14 |

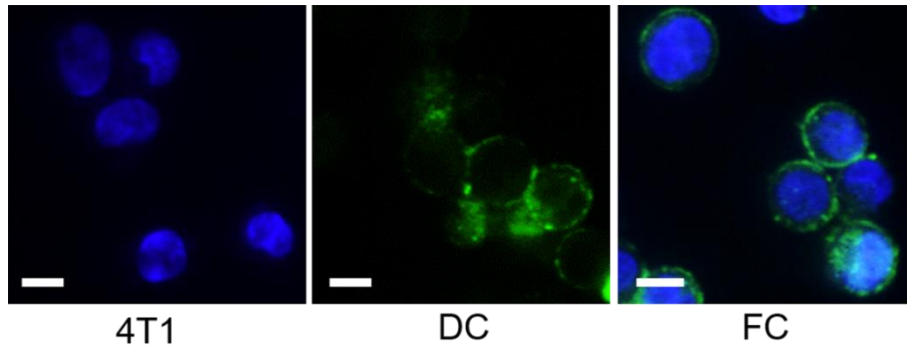

**Supplementary Figure 1 | CLSM images of 4T1, DC and FC.** CLSM images of 4T1 marked with Hoechst 33342, DCs labeled with DiO, and FCs obtained from the fusion of dyes marked 4T1 and DCs. Scale bar = 16  $\mu\text{m}$ .

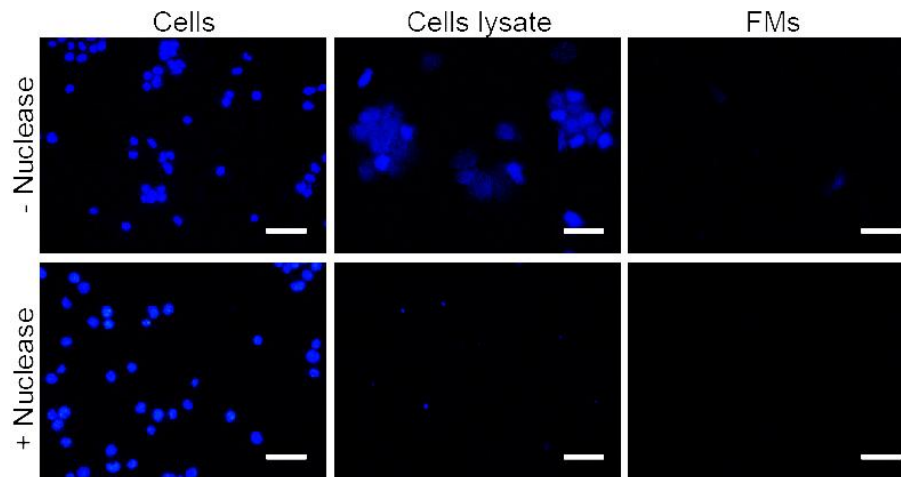

**Supplementary Figure 2 | Fluorescence images of cells, cell lysate and FMs with or without nuclease treatment after stained with Hoechst 33342. Scale bar = 50  $\mu$ m.**

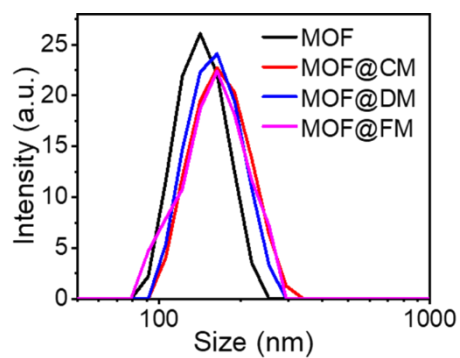

**Supplementary Figure 3 | Hydrodynamic sizes of MOF, MOF@CM, MOF@DM and MOF@FM.** Dynamic light scattering (DLS) measurements of MOF, MOF@CM, MOF@DM and MOF@FM in water (pH = 7.4). Source data are provided as a Source Data file.

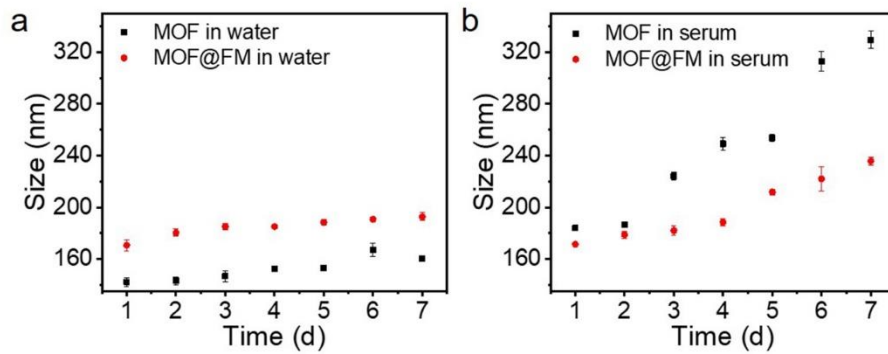

**Supplementary Figure 4 | Stability of MOF and MOF@FM in water and serum.** Hydrodynamic size changes with time of MOF and MOF@FM in water (**a**) and serum (**b**), respectively. The mean values and s.d. were presented and the same sample was measured repeatedly ( $n = 3$ ). Source data are provided as a Source Data file.

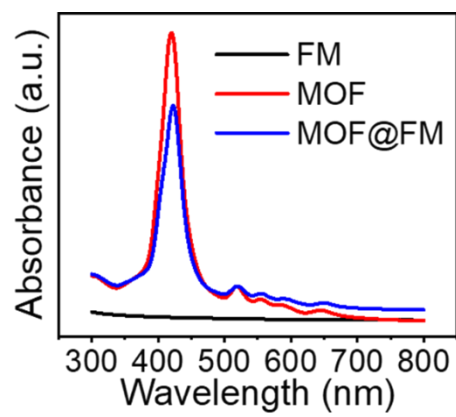

**Supplementary Figure 5** | UV-vis spectra of FM, MOF and MOF@FM. Source data are provided as a Source Data file.

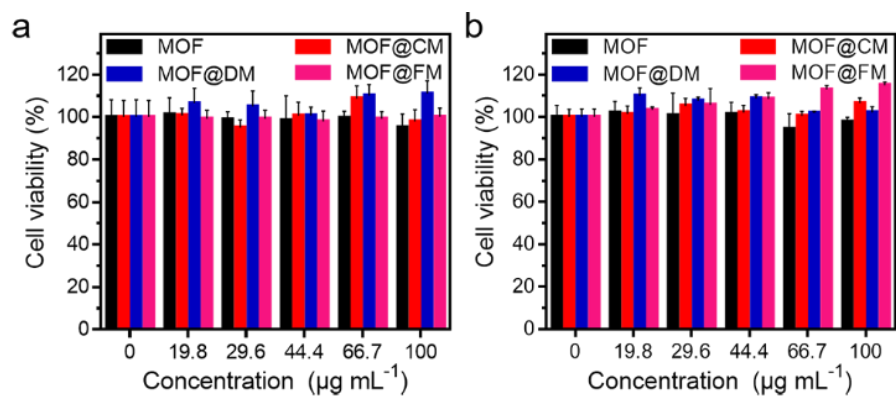

**Supplementary Figure 6 | In vitro cytotoxicity of MOF, MOF@CM, MOF@DM and MOF@FM.** In vitro cytotoxicity to 4T1 (a) and 3T3 (b) after treatment with MOF, MOF@CM, MOF@DM and MOF@FM. The mean values and s.d. were presented and measurements were taken from distinct samples ( $n = 5$ ). Source data are provided as a Source Data file.



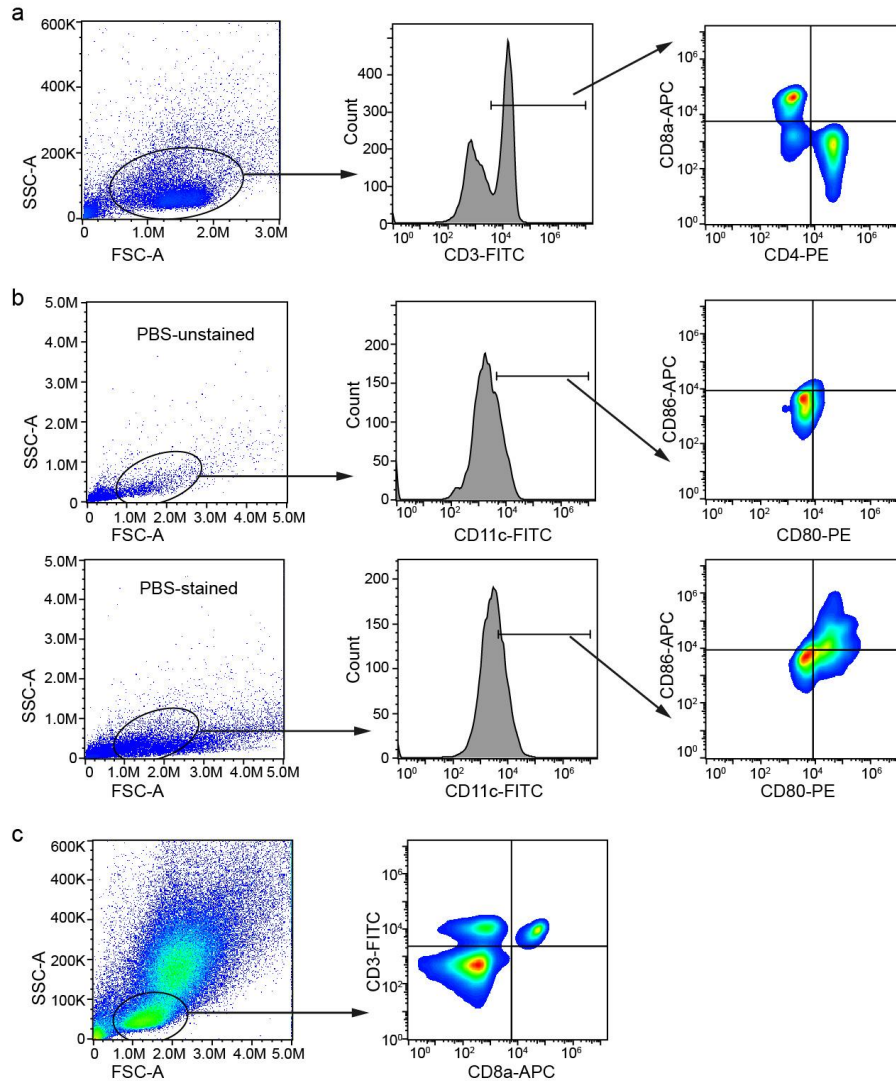

**Supplementary Figure 7 | Flow cytometry sequential gating strategies. a** Gating strategy to determine the percentage of activated T cells presented in Fig. 3b and Fig. 3g. **b** Gating strategy to determine the percentage of activated DCs presented in Fig. 3c and Supplementary Fig. 8. **c** Gating strategy to determine the percentage of CD3+CD8+ T cells presented in Fig. 5h.

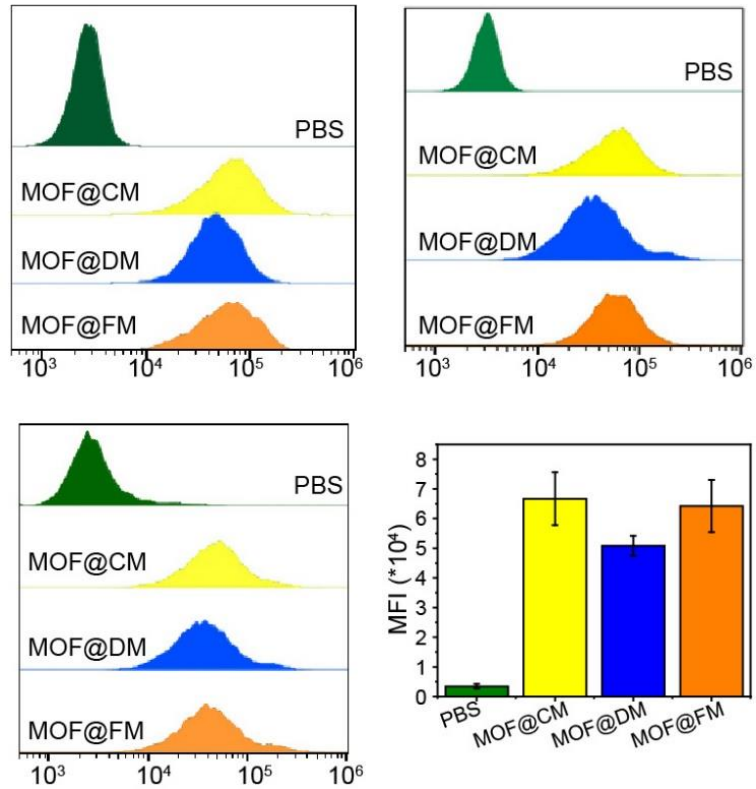

**Supplementary Figure 8 | Flow cytometry analysis of the uptake of BMDCs to MOF@CM, MOF@DM and MOF@FM.** Flow cytometry analysis of the uptake of BMDCs to MOF@CM, MOF@DM and MOF@FM and the corresponding mean fluorescence intensity (MFI) analysis. The mean values and s.d. were presented and measurements were taken from distinct samples ( $n = 3$ ). Source data are provided as a Source Data file.

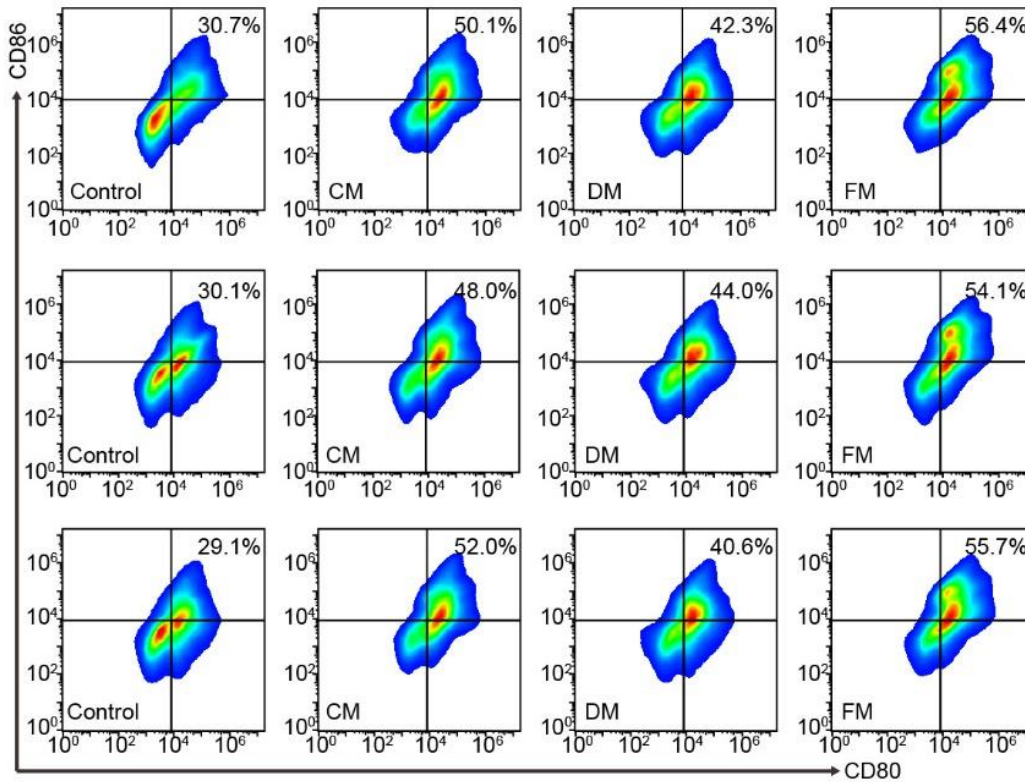

**Supplementary Figure 9 | DCs maturation after treatment with CM, DM and FM, respectively.** Flow cytometric quantification of the expression of CD80 and CD86 (the markers for DC maturation) after in vitro incubation of DCs with CM, DM and FM for 48 h.

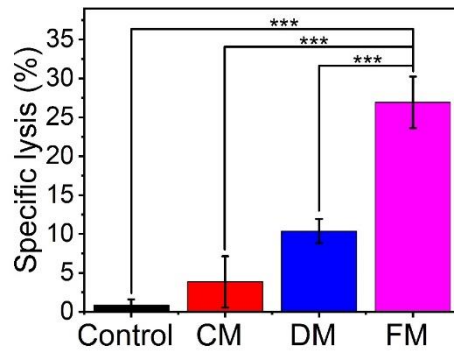

**Supplementary Figure 10 | In vitro cytotoxicity of the CM, DM or FM-pretreated DCs activating T lymphocytes against 4T1 cells.** The mean values and s.d. were presented and measurements were taken from distinct samples. (one-way ANOVA; \*\*  $p < 0.01$ , \*\*\*  $p < 0.001$ ,  $n = 5$ ). Source data are provided as a Source Data file.

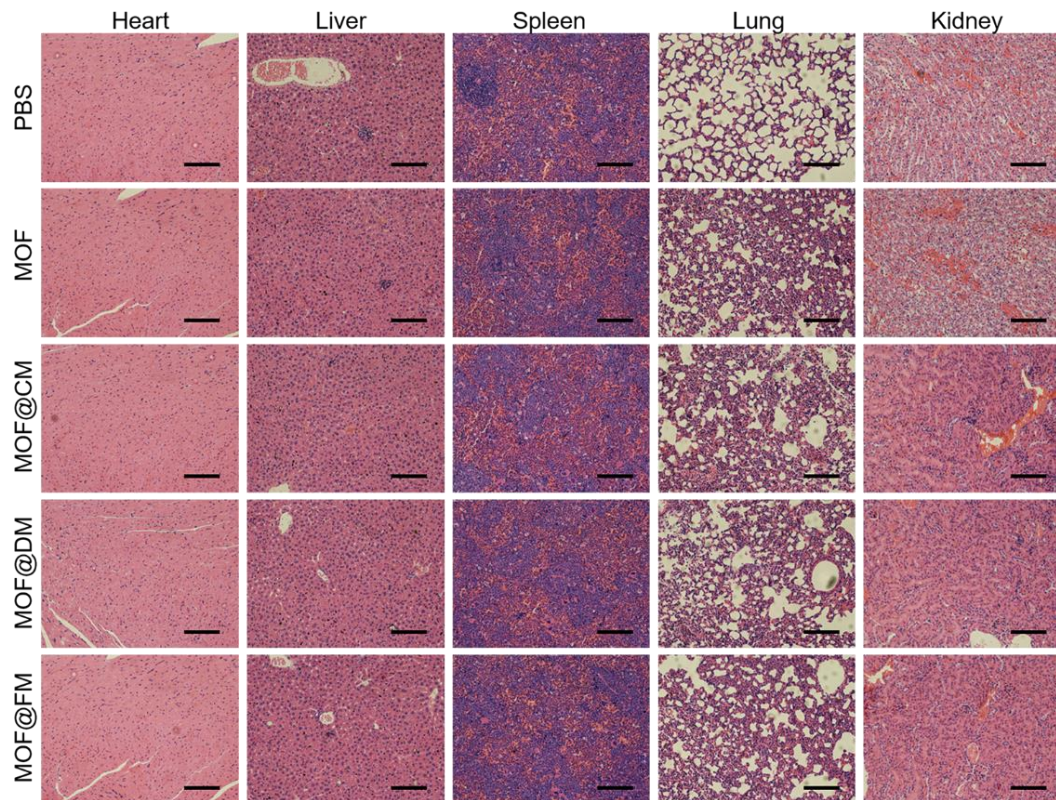

**Supplementary Figure 11 | H&E staining of major organs at 36 d after tumor inoculation. Scale bar = 20  $\mu$ m.**

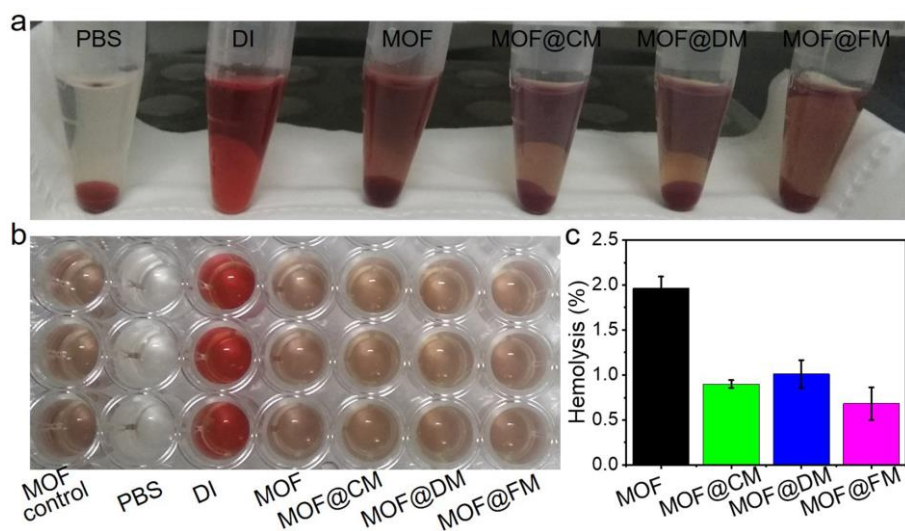

**Supplementary Figure 12 | Hemolytic assay of MOF, MOF@CM, MOF@DM and MOF@FM.** **a** The hemolytic image (from left to right: PBS, deionized water (DI), MOF, MOF@CM, MOF@DM and MOF@FM) in tubes and **(b)** plates (MOF control was used to deduct the absorbance of MOF). **c** the hemolysis analysis of MOF, MOF@CM, MOF@DM and MOF@FM. The mean values and s.d. were presented and measurements were taken from distinct samples ( $n = 3$ ). Source data are provided as a Source Data file.
